# Supplementary material for: Disability, economic and work-role status of individuals and their families in Bangladesh, post-unilateral lower-limb amputation (LLA) and pre-rehabilitation: a cross-sectional study
Source: Research Square preprint supplement (doi:10.21203/rs.3.rs-489964/v1), 2021-05-14
Supplement: Supplementary file 1 [file 14f2402d1bebe15d5dcfcc3e.docx]

Table 1: Participants socio-demographic, amputation and health characteristics

|  | N= 76 | % |
| --- | --- | --- |
| Gender  Male  Female | 62  14 | 81.6  18.4 |
| Age (years - mean (SD)) | 37.92 (12.35) | |
| <40 years  ≥40 years | 42  34 | 55.3  44.7 |
| Marital status  Married  Single  Never married  Separated  Divorced  Widowed | 48  28  24  1  1  2 | 63.2  36.8  31.6  1.3  1.3  2.6 |
| Geographical location  Rural  Urban | 60  16 | 78.9  21.1 |
| Education (years – mean (SD) | 5.53 (4.23) | |
| No or Primary  Secondary or above | 55  21 | 72.4  27.6 |
| Co-morbidities  No  Yes  Diabetic  Hypertensive  Heart disease  Bronchial Asthmatic  Other | 50  26  19  4  1  2  0 | 65.8  34.2  25.0  5.3  1.3  2.6  0.0 |
| Level of amputation  Above knee amputation  Hip Disarticulation  Trans-femoral Amputation  Knee disarticulation  Below knee amputation  Trans-tibial Amputation  Ankle disarticulation  Partial Foot Amputation | 25  1  21  3  51  47  1  3 | 32.9  1.3  27.6  3.9  67.1  61.8  1.3  3.9 |
| Cause of amputation  Non-traumatic  Infection/ Gangrene  Tumour  Vascular  Other  Traumatic- Road traffic/ other accident | 27  22  3  1  1  49 | 35.5  28.9  3.9  1.3  1.3  64.5 |

Table 2: Participants socio-economic variables

|  | Pre-LLA  (N=76) | | Post-LLA- Pre- Rehabilitation  (N=76) | |
| --- | --- | --- | --- | --- |
| N | % | n | % |
| WHODAS measurement of the extent of disabilities  Working at a Lower Level - post-LLA  No- *working at the same level*  Yes- *working at a lower level* |  |  | 7  69 | 9.2  90.8 |
| Work in last 30 Days (mean (SD))  Days totally unable to work  Days reduced work |  |  | 4.66 (3.75)  15.4 (6.60) |  |
| Occupational Status  Paid Occupations  *Paid Worker*  *Self-employed/ Business*  Non-paid Occupations/ Unemployed  *Non-paid worker*  *Student*  *Household work*  *Unemployed* | 61  *36*  *25*  15  *1*  *9*  *5*  *0* | 80.3  *47.4*  *32.9*  19.7  *1.3*  *11.8*  *6.6*  *0* | 11  *3*  *8*  65  *2*  *7*  *10*  *46* | 14.5  *3.9*  *10.5*  85.5  *2.6*  *9.2*  *13.2*  *60.5* |
| Occupational Status Change  No- *Returned to same occupation*  Yes  *Returned to different occupation*  *Failed to return to occupation* |  |  | 21  55  *9*  *46* | 27.6  72.4  *11.8*  *60.5* |
| Economic Difficulties Managing Acute Care Cost of LLA  No  Yes |  |  | 8  68 | 10.5  89.5 |
| Monthly Income*  Below the poverty line  *No income*  *Income below poverty line*  Above the poverty line | 1  *0*  *1*  59 | 1.7  *0.0*  *1.7*  98.3 | 51  *50*  *1*  9 | 85.0  *83.3*  *1.7*  15.0 |
| Monthly Income Change*  Total income loss (No Income)  Partial/ not reduced income  *Not reduced income*  *Partial reduced income* |  |  | 50  10  *2*  *8* | 83.3  16.7  *3.3*  *13.3* |
| Economic Role within the Family  Earner Role  *Primary Earner*  *Secondary Earner*  Dependent Role | 62  *52*  *10*  14 | 81.6  *68.4*  *13.2*  18.4 | 10  *5*  *5*  66 | 13.2  *6.6*  *6.6*  86.8 |
| Change of Economic Role within the Family  No- *remained in the same role***  Yes-*changed from their usual role*  *Became secondary earner*  *Became dependent* |  |  | 19  57  *5*  *52* | 25.0  75.0  *6.6*  *68.4* |

*excludes participants who did not disclose their monthly income (2.6%, n=2) and those who had no income before LLA (18.9%, n= 14)

**includes dependents (18.9%, n= 14)- no changes observed pre and post LLA among this group

Table 3: Cross-tabulations of socio-economic, health, amputation variables with outcome variables

| Variable | Occupational status change after LLA (n=76) | | Economic difficulties managing acute care cost of LLA (n=76) | | Monthly income reduced compared to the poverty line after LLA (n=60) * | | Change of economic role within the family after LLA(n=76) | |
| --- | --- | --- | --- | --- | --- | --- | --- | --- |
| No  n (%) | Yes  n (%) | No  n (%) | Yes  n (%) | No  n (%) | Yes  n (%) | No  n (%) | Yes  n (%) |
| Age (at time of interview)  Below 40 years  40 years and above | χ2(1) =5.14, p=0.023** | | χ2(1) =7.24, p= 0.007**^ | | χ2(1) =2.26, p= 0.175^ | | χ2(1) =5.53, p= 0.019** | |
| 16 (21.1%)  5 (6.6%) | 26 (34.2%)  29 (38.2%) | 8 (10.5%)  0 (0%) | 34 (44.7%)  34(44.7%) | 7 (11.7%)  3 (5.0%) | 22 (36.7%)  28 (46.7%) | 18(23.7%)  6 (7.9%) | 24 (31.6%)  28 (36.8%) |
| Sex  Female  Male | χ2(1) =1.99, p= 0.158 | | χ2(1) =0.21, p= 1.000^ | | χ2(1) =0.12, p= 1.000^ | | χ2(1) =1.01, p= 0.315 | |
| 6 (7.9%)  15(19.7%) | 8 (10.5%)  47 (61.8%) | 1 (1.3%)  7 (9.2%) | 13 (17.1%)  55 (72.4%) | 1 (1.7%)  9 (15%) | 7 (11.7%)  43 (71.7%) | 6 (7.9%)  18 (23.7%) | 8 (10.5%)  44 (57.9%) |
| Geographical location  Rural  Urban | χ2(1) =2.63, p= 0.105 | | χ2(1) =0.08, p= 0.672^ | | χ2(1) =0.75, p= 0.403^ | | χ2(1) =3.18, p= 0.074 | |
| 14(18.4%)  7 (9.2%) | 46 (60.5%)  9 (11.8%) | 6 (7.9%)  2 (2.6%) | 54 (71.1%)  14 (18.4%) | 7 (11.7%)  3 (5.0%) | 41 (68.3%)  9 (15.0%) | 16 (21.1%)  8 (10.5%) | 44 (57.9%)  8 (10.5%) |
| Education  No/ Primary  Secondary/ Higher | χ2(1) =1.59, p= 0.207 | | χ2(1) =10.03, p= 0.005**^ | | χ2(1) =0.75, p= 0.670^ | | χ2(1) =1.71, p= 0.194 | |
| 13(17.1%)  8 (10.5%) | 42 (55.3%)  13 (17.1%) | 2 (2.6%)  6 (7.9%) | 53 (69.7%) 15 (19.7%) | 9 (15.0%)  1 (1.7%) | 39 (65.0%)  11 (18.3%) | 15 (19.7%)  9 (11.8%) | 40 (52.6%) 12 (15.8%) |
| Marital Status  Married  Single | χ2(1) =3.01, p= 0.083 | | χ2(1) =9.86, p= 0.003**^ | | χ2(1) =1.44, p= 0.426^ | | χ2(1) =4.53, p= 0.033** | |
| 10(13.2%)  11(14.5%) | 38 (50%)  17 (22.4%) | 1 (1.3%)  7 (9.2%) | 47 (61.8%)  21 (27.6%) | 9 (15.0%)  1 (1.7%) | 36 (60.0%)  14 (23.3%) | 11 (14.5%)  13 (17.1%) | 37 (48.7%)  15 (19.7%) |
| Level of Amputation  Above Knee  Below Knee | χ2(1) =0.36, p= 0.551 | | χ2(1) =1.69, p= 0.259^ | | χ2(1) =3.30, p= 0.143^ | | χ2(1) =0.003, p= 0.956 | |
| 8 (10.5%)  13 (17.1%) | 17 (22.4%)  38 (50%) | 1 (1.3%)  7 (9.2%) | 24 (31.6%)  44 (57.9%) | 6 (10.0%)  4 (6.7%) | 15 (25.0%)  35 (58.3%) | 8 (10.5%)  16 (21.1%) | 17 (22.4%)  35 (46.1%) |
| Cause of Amputation  Traumatic  Non-traumatic | χ2(1) =1.74, p= 0.187 | | χ2(1) =4.93, p= 0.045**^ | | χ2(1) =0.35, p= 0.727^ | | χ2(1) =0.62, p= 0.431 | |
| 16 (21.1%)  5 (6.6%) | 33 (43.4%)  22 (28.9%) | 8 (10.5%)  0 (0.0%) | 41 (53.9%)  27 (35.5%) | 7 (11.7%)  3 (5.0%) | 30 (50.0%)  20 (33.3%) | 17 (22.4%)  7 (9.2%) | 32 (42.1%)  20 (26.3%) |
| Comorbidities  No  Yes | χ2(1) =0.01, p= 0.921 | | χ2(1) =0.34, p= 0.708^ | | χ2(1) =0.96, p= 0.471^ | | χ2(1) =0.01, p= 0.913 | |
| 14 (18.4%)  7 (9.2%) | 36 (47.4%)  19 (25.0%) | 6 (7.9%)  2 (2.6%) | 44 (57.9%)  24 (31.6%) | 8 (13.3%)  2 (3.3%) | 32 (53.3%)  18 (30.0%) | 16 (21.1%)  8 (10.5%) | 34 (44.7%)  18 (23.7%) |
| Economic Role within the Family – pre-LLA  Earner  Dependent | χ2(1) =28.95, p <0.001**^ | | χ2(1) =28.39, p<0.001**^ | | NA | | χ2(1) =37.18, p<0.001**^ | |
| 9 (11.8%)  12 (15.8%) | 53 (69.7%)  2 (2.6%) | 1 (1.3%)  7 (9.2%) | 61 (80.3%)  7 (9.2%) |  |  | 10 (13.2%)  14 (18.4%) | 52 (68.4%)  0 (0%) |
| Monthly Income- pre-LLA*  Below Poverty line  Above poverty line | χ2(1) =0.16, p= 1.000^ | | χ2(1) =0.017, p= 1.000^ | | χ2(1) =5.09, p= 0.167^ | | χ2(1) =0.179, p= 1.000^ | |
| 0 (0.0%)  8 (13.3%) | 1 (1.7%)  51 (85.0%) | 0 (0%)  1 (1.7%) | 1 (1.7%)  58 (96.7%) | 1 (1.7%)  9 (15.0%) | 0 (0.0%)  50 (83.3%) | 0 (0.0%)  9 (15.0%) | 1 (1.7%)  50 (83.3%) |
| Occupational Status- pre-LLA  Paid Occupations  Non-paid Occupations or unemployed | χ2(1) =32.57, p<0.001**^ | | χ2(1) =25.92, p<0.001**^ | | NA | | χ2(1) =32.99, p<0.001**^ | |
| 8 (10.5%)  13 (17.1%) | 53 (69.7%)  2 (2.6%) | 1 (1.3%)  7 (9.2%) | 60 (78.9%)  8 (10.5%) |  |  | 10 (13.2%)  14 (18.4%) | 51 (67.1%)  1 (1.3%) |
| WHODAS Total Score  No/ Mild  Moderate/ Extreme | χ2(1) =0.89, p= 0.387^ | | NA |  | χ2(1) =0.21, p= 0.528^ | | χ2(1) =5.67, p= 0.029**^ | |
| 3 (3.9%)  18(23.7%) | 4 (5.3%)  51 (67.1%) |  |  | 1 (1.7%)  9 (15.0%) | 3 (5.0%)  47 (78.3%) | 5 (6.6%)  19 (25%) | 2 (2.6%)  50 (65.8%) |

*excludes participants who did not disclose their monthly income (2.6%, n=2) or had no income before LLA (18.9%, n= 14)

**p≤0.05; ^ denotes where the Fisher’s Exact Test p-value was reported given the minimum cell count was less than five
